1 ***Mycobacterium* phage Butters-encoded proteins contribute to host defense**  
2 **against viral attack**

3 Catherine M. Mageeney<sup>a,\*</sup>, Hamidu T. Mohammed<sup>a</sup>, Marta Dies<sup>b,c</sup>, Samira Anbari<sup>b</sup>, Netta  
4 Cudkevich<sup>a</sup>, Yanyan Chen<sup>c</sup>, Javier Buceta<sup>b,c,#</sup>, Vassie C. Ware<sup>a,#</sup>

5

6 <sup>a</sup>Department of Biological Sciences, Lehigh University, Bethlehem, PA 18015

7 <sup>b</sup>Department of Chemical and Biomolecular Engineering, Lehigh University, Bethlehem,  
8 PA 18015

9 <sup>c</sup>Department of Bioengineering, Lehigh University, Bethlehem, PA 18015

10 \*Present Address: Sandia National Laboratories, Systems Biology Department,  
11 Livermore, CA 94551-0969

12

13 Running title: Host defenses use mycobacteriophage-encoded proteins

14

15 Address correspondence to Vassie C. Ware, [vcw0@lehigh.edu](mailto:vcw0@lehigh.edu) and Javier Buceta at  
16 [jbuceta@lehigh.edu](mailto:jbuceta@lehigh.edu)

17

18 Catherine M. Mageeney and Hamidu T. Mohammed contributed equally to this work.  
19 Author order was determined by the coauthor who initiated experiments prior to the  
20 involvement of the other coauthor.

21

22 Word count: Abstract: **130**; Main Text (Introduction+Results+Discussion+Methods):  
23 **5964**

24

## 25 **ABSTRACT**

26 A diverse set of prophage-mediated mechanisms protecting bacterial hosts from  
27 infection has been recently uncovered within Cluster N mycobacteriophages. In that  
28 context, we unveil a novel defense mechanism in Cluster N prophage Butters. By using  
29 bioinformatics analyses, phage plating efficiency experiments, microscopy, and  
30 immunoprecipitation assays, we show that Butters genes located in the central region of  
31 the genome play a key role in the defense against heterotypic viral attack. Our study  
32 suggests that a two component system articulated by interactions between protein  
33 products of genes *30* and *31* confers defense against heterotypic phage infection by  
34 PurpleHaze or Alma, but is insufficient to confer defense against attack by the  
35 heterotypic phage Island3. Therefore, based on heterotypic phage plating efficiencies  
36 on the Butters lysogen, additional prophage genes required for defense are implicated.

37

## 38 **IMPORTANCE**

39 Many sequenced bacterial genomes including pathogenic bacteria contain prophages.  
40 Some prophages encode defense systems that protect their bacterial host against  
41 heterotypic viral attack. Understanding the mechanisms undergirding these defense  
42 systems will be critical to development of phage therapy that circumvents these  
43 defenses. Additionally, such knowledge will help engineer phage-resistant bacteria of  
44 industrial importance.

45

## 46 **INTRODUCTION**

47 Mycobacteriophages – viruses infecting mycobacterial hosts- are of interest because  
48 they are useful in diagnostics of mycobacterial infections (1), the most notable of which  
49 is tuberculosis (TB), and additionally can serve as genetic tools for mycobacteria (2-5).  
50 Most recently, engineered mycobacteriophages have been used in therapeutic

51 applications to combat infections from antibiotic-resistant strains of *Mycobacterium*  
52 *abscessus* (6). To date over 11,000 mycobacteriophages have been isolated, over  
53 1,800 sequenced, and over 1,600 are available in GenBank (7, 8). Mycobacteriophages  
54 are a small subset of the estimated  $10^{31}$  bacteriophages existing in the biosphere (9).  
55 Mycobacteriophages display high levels of genetic diversity and have been divided into  
56 29 genomically similar clusters (A-AC) and a group of singletons with no close relatives  
57 (10, 7). Although an increase in isolation and genomic characterization of  
58 mycobacteriophages has occurred recently, the void in knowledge about gene  
59 expression and function of mycobacteriophage gene products remains.

60 Prophages make up a majority of the known bacteriophage population (11). The  
61 relationship between prophages and bacterial strains has shown numerous benefits to  
62 both the hosts and phages. Prophages confer many advantages to the host upon  
63 integration such as enhanced fitness, reduction of mutation rates, selective advantages,  
64 and defense against additional viral attack (12). The bacterial host in turn provides the  
65 phages with protection from harsh environments (12). In this context, numerous  
66 mechanisms of defense have been recently discovered for *Pseudomonas*,  
67 *Mycobacterium*, and *Gordonia* prophages (13-16), with the expectation that prophage-  
68 mediated defense systems are likely widespread throughout the bacterial-phage world.  
69 Cluster N phages have been investigated for defense mechanisms that allow the host  
70 bacterium to become resistant to heterotypic phage attack (14). Currently 29 Cluster N  
71 mycobacteriophage genomes are found in GenBank (8). Cluster N mycobacteriophages  
72 are characterized by small genomes (40.5-44.8kbp) (14; phagesdb.org). These  
73 bacteriophages have siphoviridae morphologies and are capable of integration into the  
74 *Mycobacterium smegmatis* mc<sup>2</sup>155 *attB* site tRNA-Lys (MSMEG\_5758) (17, 14).

75 Here we focus on *Mycobacterium* phage Butters that was isolated on *M. smegmatis*  
76 mc<sup>2</sup>155. Butters is one of the smallest members of Cluster N with a genome of  
77 41,491bp (18) and contains 66 open reading frames (ORFs). The Butters genome can  
78 be divided into three regions (Figure S1). Genes in the first region are rightward-  
79 transcribed, encoding structural genes such as capsid and tail proteins (genes 1-25).  
80 The central portion of the genome (genes 26-40) encodes two endolysins (Lysin A and

81 Lysin B), a holin, genes used for integration and excision of the genome, and,  
82 importantly, many genes with unknown functions. Within the central region of all Cluster  
83 N genomes is the “variable region” (Figure S1) that has considerable genomic variation  
84 among all Cluster N phages (14). Finally, the third region includes rightward-transcribed  
85 genes (genes 41-66) encoding proteins used in DNA maintenance and many of  
86 unknown function.

87 Cluster N mycobacteriophage prophage-mediated defense is a function of genes in the  
88 central variable region (14). Genes 30 and 31, are in the Butters variable region and  
89 were originally classified as orphans (i.e., genes with no known mycobacteriophage  
90 counterpart) prior to their discovery in a recently characterized Cluster N phage  
91 Rubeelu. Yet, their function remains unknown. These genes are among those  
92 expressed in a Butters lysogen (14), rendering them as suitable candidates that mediate  
93 defense of the lysogen against heterotypic phages.

94 Here we used bioinformatic analyses, heterotypic phage plating efficiency experiments,  
95 microscopy, and immunoprecipitation experiments to explore the roles of gp30 and  
96 gp31 in protecting a Butters lysogen from phage attack. Our results suggest that gp30  
97 and gp31 interact and that gp31 may have an impact on the subcellular localization of  
98 gp30. Efficiency of plating data on *M. smegmatis* strains expressing gp30, gp31, or  
99 gp30 and gp31 combined, show that PurpleHaze attack is completely abolished when  
100 gp30 is expressed alone but infection is partially restored when gp30 is co-expressed  
101 with gp31. Moreover, for Cluster A9 mycobacteriophage Alma, viral attack is  
102 significantly inhibited by gp30, but no inhibition is observed when gp30 is co-expressed  
103 with gp31. Altogether, we propose that gp30-gp31 interaction is instrumental against  
104 specific viral attack. Further, since the proposed Butters gp30/gp31 system has no  
105 apparent effect on attack by Cluster I1 phage Island3, we suggest a gp30-independent  
106 defense mechanism against this phage. Collectively, these data demonstrate that  
107 multiple defense mechanisms are encoded by the Butters prophage.

108

## 109 **RESULTS**

110 **Bioinformatics analyses predict transmembrane domains (TMDs) for**  
111 **Mycobacteriophage Butters gp31 but not for gp30**

112 Butters gp30 (GenBank protein ID: AGI12977.1) and gp31 (GenBank protein ID:  
113 AGI12978.1) were analyzed for transmembrane domains using TMHMM (19, 20).  
114 Butters gp30 was not predicted to have any TMDs (Figure 1A), while gp31 is predicted  
115 to have four (Figure 1B). Two additional proteins, gp28 and gp21 (GenBank protein IDs:  
116 AGI12968.1; GI12975.1, respectively), were analyzed by TMHMM and used as  
117 bioinformatics controls. A known membrane protein, gp28 (annotated holin) is predicted  
118 to have two TMDs (Figure S2A) and an annotated minor tail protein, gp21, has no  
119 predicted hydrophobic domains, suggesting its cytoplasmic localization (Figure S2B).  
120 These results are indicative of cytoplasmic localization for gp30 and membrane  
121 integration for gp31.

122 I-TASSER (21) and PHYRE (22) were used to further analyze gp30 and gp31  
123 structures. Gp30 has weak homology with protein structures in the PDB and no  
124 distinguishing features (Figure 1C). Butters gp31 is predicted to have 4 alpha-helices  
125 which presumptively are membrane spanning in concord with the TMHMM posterior  
126 probabilities for gp31 (Figure 1D).

127 Gp30 and gp31 were also analyzed using HHpred to investigate function (23, 24).  
128 HHpred analysis of gp30 yields a weak hit to the motif DUF4747 (Probability: 69.48, E-  
129 value: 140) (Figure 2A). This DUF4747 domain is conserved in the cytoplasmic  
130 components of the Abi systems uncovered in coliphage Lambda [RexA] (25, 26),  
131 *Mycobacterium* phage Sbash [gp30] (15), and *Gordonia* phage CarolAnn [gp44] (16)  
132 (Figure 2B). Lambda cytoplasmic RexA (when activated by a protein-DNA complex of  
133 the invading phage) binds to the membrane protein RexB (an ion channel) which  
134 depolarizes the membrane resulting in loss of intracellular ATP, death of the bacterium,  
135 and abortion of infection (27). Similar mechanisms of action have been proposed for the  
136 Abi systems of Sbash (15) and CarolAnn (16). Remarkably, Butters gp31 and all the  
137 membrane components of these Abi systems have 4 transmembrane domains (Figure 1  
138 and Figure S3). These findings highlight the possibility that Butters gp30 and gp31 may

139 play roles in prophage-mediated defense in a way analogous to the RexAB-Abi system.  
140 Butters gp31 has weak homology to bacteriophage holins from Enterobacter phage P21  
141 (probability: 58.8, E-value: 25), *Haemophilus* phage HP1 (probability: 52.88, E-value:  
142 39), pneumococcal phage Dp-1 (probability: 21.24, E-value: 550), and to a  
143 bacteriophage holin family, superfamily II-like (probability: 64.23, E-value: 26) (28).  
144 However, it is atypical for holin proteins to have more than two TMDs (29). Moreover,  
145 gene 31 is expressed in the Butters lysogenic cycle (14), rendering a holin function  
146 unlikely for gp31.

147

#### 148 **Phage infection assays indicate that gp30 and gp31 are components of a** 149 **prophage-mediated defense system against viral attack**

150 Given the shared structural homology between Butters gp30 and gp31 and the Abi  
151 systems of coliphage lambda, *Gordonia* phage CarolAnn, and Mycobacteriophage  
152 Sbash (Figures 2 and S3) coupled with the fact that all characterized Cluster N  
153 mycobacteriophage prophage-mediated defenses have been mapped to genes within  
154 the central variable region of their genomes (14), we hypothesized that Butters genes  
155 30 and 31 are involved in prophage-mediated defense. We tested this hypothesis using  
156 a phage infection assay. We spotted serial dilutions of a selected panel of heterotypic  
157 phages known to be inhibited by the Butters lysogen: Alma and Island3 (14; this study)  
158 and PurpleHaze (this study) on lawns of *M. smegmatis* mc<sup>2</sup>155 derivatives expressing  
159 Butters gene 30 alone, Butters gene 31 alone, and both Butters genes 30 and 31  
160 represented as mc<sup>2</sup>155(gp30), mc<sup>2</sup>155(gp31), and mc<sup>2</sup>155(gp30-31), respectively  
161 (Figure 3). Phage serial dilutions were also spotted on a Butters lysogen,  
162 mc<sup>2</sup>155(Butters), and a Butters lysogen variant with gene 30 deleted,  
163 mc<sup>2</sup>155(ButtersΔ30).

164 All phages efficiently infected an *M. smegmatis* mc<sup>2</sup>155 strain carrying the empty vector  
165 pMH94 (Figure S4A). Eponine(K4) plated efficiently on all lawns while  
166 ShrimpFriedEgg(N) was inhibited by the lysogenic strains expressing the Butters  
167 immunity repressor (Figure 3 and Table S1). Heterotypic phages PurpleHaze(A3),

168 Island3(I1), and Alma(A9) had reduced efficiency of plating on an *M. smegmatis*  
169 mc<sup>2</sup>155(Butters) lawn (14; Figure 3 and Table S1). Defense against heterotypic phages  
170 is independent of immunity repressor function (14); therefore, we would predict that  
171 inhibition of PurpleHaze, Island3, and Alma infection would be mediated by other genes.  
172 *M. smegmatis* mc<sup>2</sup>155 strains expressing Butters gp30 alone, completely abolished  
173 PurpleHaze infection, reduced infection of Alma by 4 orders of magnitude but had no  
174 apparent effect on Island3 infection (Figure 3 and Table S1). These results delineate the  
175 presence of at least two distinct defense mechanisms encoded by the Butters prophage  
176 against heterotypic phages: one mediated by gp30 and the other, gp30-independent.  
177 Remarkably, while the strain expressing only gp31 had no inhibitory effect on all phages  
178 tested, co-expressing gp31 with gp30 attenuated the inhibitory effect gp30 had on  
179 PurpleHaze and completely abolished gp30 antagonism of Alma (Figure 3 and Table  
180 S1). This establishes a functional interaction between gp30 and gp31.

181 Next, we tested phages on mc<sup>2</sup>155(Butters $\Delta$ 30). For PurpleHaze, the absence of gene  
182 30 resulted in near total recovery of infection (Figure 3 and Table S1). Therefore,  
183 inhibition is almost exclusively dependent on the presence of Butters gp30. On the other  
184 hand, infection by Island3 is still inhibited, implicating a gp30-independent mechanism  
185 for defense against this phage. Island3 plates efficiently on another Cluster N phage  
186 lysogen [mc<sup>2</sup>155(ShrimpFriedEgg)], demonstrating that defense against Island3 is not  
187 repressor-mediated (Figure S4B). Collectively, our data support the proposal that  
188 multiple defense mechanisms against heterotypic viral attack are specified within the  
189 Butters genome.

190

### 191 **Microscopy reveals a functional link between gp30 and gp31**

192 To visually confirm the localization of gp30 and gp31 predicted by bioinformatics  
193 analyses (Figure 1) and explore a possible physical interaction between gp30 and gp31,  
194 we performed fluorescence microscopy experiments. To minimize the possible effects  
195 of fluorescent probes in the function and cellular localization of our proteins of interest,  
196 we used the FIAsh system (Materials and Methods) to tag gp30 (gp30T) and gp31

197 (gp31T). We point out that *M. smegmatis* mc<sup>2</sup>155 expresses endogenous proteins with  
198 amino acid domains recognized by the FIAsh dye, thus limiting its specificity (Figure  
199 S5). For this reason, and given the successful precedent of heterologous expression of  
200 mycobacterial and mycobacteriophage proteins in *E. coli* (30), we performed our  
201 imaging in wild-type strain K-12 MG1655.

202 While we observed cell-to-cell variability in the case of gp31, all MG1655(gp31T) cells  
203 showed a fluorescent signal located in evenly distributed clusters (Figure 4). This  
204 pattern is compatible with predicted phage membrane protein integration as shown in  
205 previous studies (31), yet is different from membrane patterning for holin (32). On the  
206 other hand, MG1655(gp30T) cells did not reveal a significant signal for gp30 (Figure 4).  
207 In order to check the efficiency of FIAsh labeling for Butters proteins with a predicted  
208 cytoplasmic localization, we performed control experiments using a strain expressing  
209 gp21, MG1655(gp21T). In that case, we found a consistent cytoplasmic signal (Figure  
210 S6). Thus, while microscopy experiments were able to show the predicted localization of  
211 gp31, they were inconclusive with regard to gp30 localization.

212 To investigate if the proposed interaction suggested by the phage infection assay  
213 between gp30 and gp31, modifies the signal pattern, we developed strains co-  
214 expressing these proteins under the control of the same promoter. In one case only  
215 gp30 was tagged to produce strain MG1655(gp31gp30T), whereas in the other strain  
216 gp31 was tagged to create strain MG1655(gp31Tgp30). The signaling pattern for strain  
217 MG1655(gp31Tgp30) revealed intensity and distribution equivalent to the pattern  
218 observed when gp31 was expressed alone (Figure 4). In the dual expressing strain  
219 where gp30 was tagged [MG1655(gp31gp30T)], only a few cells showed signal (Figure  
220 4, S7). These cells consistently displayed two distinct patterns (Figure 4). While some  
221 cells showed a pattern compatible to that expected for cytoplasmic localization, others  
222 showed a membrane pattern similar to that observed in strains where gp31 was tagged:  
223 MG1655(gp31T) and MG1655(gp31Tgp30).

224 As for the cell phenotype, we found that MG1655(gp31T) cells displayed an elongated  
225 phenotype; yet, we did not observe filamentation (Figure S7; 33). Our data also indicate  
226 that gp30-expressing cells have a phenotype compatible with that observed in wild-type



227 cells (Figure 4 and Figure S7). Interestingly, in cells co-expressing genes 30 and 31, the  
228 gp31-induced elongation phenotype was lessened (Figure S7). Hence, the presence of  
229 gp30 diminishes the elongation phenotype observed when gp31 is expressed alone,  
230 supporting the proposal of a functional interaction between gp30 and gp31.

231

## 232 **Immunoprecipitation experiments hint at an interaction between gp30 and gp31**

233 The phage infection assay and microscopy experiments suggest a gp30-gp31 functional  
234 interaction. To explore the possibility of a physical interaction, we performed co-  
235 immunoprecipitation (co-IP) experiments using BL21 *E. coli* extracts from strains  
236 expressing FLAG-tagged gp31 or His-tagged gp30 or both. For Western blot analysis  
237 of the strain expressing gp30His alone, no immunoreactive signal at the predicted  
238 molecular mass of gp30His (~40kDa) was detected when the bacterial lysate, previously  
239 resuspended and boiled in SDS sample buffer, was probed with the anti-His antibody  
240 (Figure 5). We therefore used 6M urea for protein denaturation and observed an  
241 immunoreactive product at the expected molecular size of ~40kDa (Figure 5). Following  
242 a His-IP using a lysate from the strain expressing both gp30His and gp31FLAG, our  
243 anti-FLAG probe detected a product at ~100kDa. Interestingly, this product is higher  
244 than ~61kDa - predicted for a complex of one molecule of gp30 (~40kDa) and one  
245 molecule of gp31 (~21kDa). Our inability to detect an immunoreactive signal for gp30His  
246 or for gp30His-gp31FLAG on probing with an anti-His antibody may be due to  
247 inaccessibility of the His-tag. These results support the possibility of a physical  
248 interaction between gp30 and gp31.

249

## 250 **DISCUSSION**

251 **Identification of *Mycobacterium* phage Butters transmembrane protein gp31 and**  
252 **gp30 as components of a host antiviral defense system**

253 Numerous bacterial defense systems that protect against bacteriophage infection at  
254 multiple stages in the phage infection cycle have been described (reviewed in 34), with  
255 additional systems likely to be uncovered as comparative bacterial genomics continues  
256 to expand. Equally important within microbial communities are bacteriophage  
257 counterattack mechanisms that subvert bacterial defense efforts (reviewed by 35). For  
258 temperate phages, mutually beneficial host-phage interactions have evolved to support  
259 efficient propagation of both bacteria and phage, and to maintain lysogeny. Expression  
260 of prophage genes contributes to a profile of potentially unique capabilities within the  
261 bacterial host, including new functions that affect numerous aspects of bacterial  
262 physiology and metabolism, and in the context of the work described here, new  
263 capabilities that specify defense mechanisms that alter the phage resistance phenotype  
264 of the host.

265 The recent discovery of genes within Cluster N mycobacteriophage genomes that  
266 function as part of host defense mechanisms against heterotypic viral attack when  
267 expressed from the prophage in a Cluster N lysogen has broadened our understanding  
268 of the diversity of anti-phage defense systems and co-evolving counterattack viral  
269 systems (14). At least five different defense mechanisms were uncovered that include a  
270 restriction system, a predicted (p)ppGpp synthetase single-subunit restriction system, a  
271 heterotypic exclusion system and a predicted (p)ppGpp synthetase, which blocks lytic  
272 phage growth, promotes bacterial survival and enables efficient lysogeny. In each case  
273 described, relevant phage genes mediating defense are positioned within a centrally-  
274 located variable region of the phage genome and are highly expressed in RNAseq  
275 profiles from Cluster N lysogens (14). For *Mycobacterium* phage Butters, genes  
276 involved in defense had not previously been identified experimentally, nor had any  
277 experimental validation related to protein localization been completed. Genes 30 and 31  
278 were originally of interest because of their novel representation as orphans among all  
279 known mycobacteriophage genes analyzed at the beginning of these studies. Insights  
280 about gp30 and gp31 localization were revealed using computational tools (TMHMM, I-  
281 TASSER, PHYRE) to predict membrane domains. The existence of conserved protein  
282 domain identified by HHpred informed predictions about protein functions.

283 We coupled bioinformatics analyses with fluorescence imaging of tagged proteins in  
284 MG1655 *E. coli* and plating efficiencies of heterotypic phages on *M. smegmatis* mc<sup>2</sup>155  
285 strains expressing Butters proteins gp30 and gp31 to provide experimental validation for  
286 the proposal that gp30 and 31 are components of a prophage-mediated antiviral system  
287 expressed within a Butters lysogen. Computational predictions that Butters gp31 is a  
288 membrane protein are supported by fluorescence imaging of MG1655 *E. coli* cells  
289 expressing Butters gp31. In this case, gp31 is found in association with the *E. coli*  
290 membrane and by inference, we conclude that Butters gp31 would likewise be  
291 incorporated into the membrane of an *M. smegmatis* host as well. As for Butters gp30,  
292 microscopy experiments using strains expressing gp30 alone were not conclusive with  
293 respect to its subcellular localization since cells only displayed a signal with levels  
294 slightly above background (Figure S7). Still, when gp30 was co-expressed with gp31  
295 our data point toward an interaction between gp30 and gp31. On the one hand, we  
296 observed a phenotypic change (the gp31-induced cell elongation is lessened),  
297 demonstrating a functional interaction. On the other hand, we systematically observed  
298 some cells with a gp30 expression pattern compatible with either a membrane  
299 localization or a cytoplasmic localization. Taken together, these results and evidence  
300 from immunoprecipitation assays hint at a physical interaction between gp30 and gp31,  
301 and is suggestive of conformational remodeling.

302

### 303 **Model for prophage-encoded exclusion system to prevent heterotypic phage** 304 **infection**

305 Several mechanisms have been uncovered to account for resistance or immunity from  
306 viral attack within bacterial lysogens. Repressor-mediated immunity accounts for the  
307 ability of an immunity repressor (encoded by a prophage) to inhibit the lytic cycle and  
308 superinfection by homotypic phages harboring a similar immunity system. In this study,  
309 repressor-mediated immunity accounts for inhibition of infection by homotypic phage  
310 ShrimpFriedEgg(N) on Butters and Butters $\Delta$ 30 lysogen lawns. Superinfection exclusion  
311 (Sie) prevents viral attack from heterotypic phages with dissimilar immunity systems by

312 likely blocking DNA entry into host cells which results in resistance to infection by  
313 certain phages. Unlike repressor-mediated and Sie systems that block phage  
314 superinfection, Abi systems counter phage attack but lead to host cell death. These  
315 systems may target any stage of the phage infection cycle including DNA replication,  
316 transcriptional activation, or translation to eradicate the phage threat, but in doing so,  
317 also abolish the life of the host cell as well (27).

318 A widely studied Abi system is the Rex system, a two-component protection system of  
319 proteins RexA and RexB, encoded by the lambda prophage in an *E. coli* lysogen to  
320 prevent lytic phage superinfection (reviewed in 27). In this system, inactive RexA is  
321 activated in the cytoplasm through interactions with an invading phage DNA-protein  
322 complex following phage adsorption and DNA injection. Two activated RexA proteins  
323 bind the transmembrane protein RexB, which functions as an ion channel. Influx of ions  
324 disrupts membrane potential, leading to host cell death and ultimately quenches phage  
325 infection. Interestingly, an additional function proposed for RexB (36) is to prevent  
326 lambda phage self-exclusion following induction of a lysogen (37). Changes in the ratio  
327 of RexA and RexB are proposed to impact superinfection exclusion (38).

328 The low degree of structural similarity between RexA and Butters gp30 (shown by the  
329 DUF4747 domain) would not typically be used to assign a functional prediction due to  
330 the low probability and high E score. Yet, the presence of this stretch of homology (also  
331 conserved in cytoplasmic components of analogous Abi systems described in *Gordonia*  
332 phage CarolAnn and Mycobacteriophage Sbash) may provide clues for how gp30 may  
333 function in conjunction with gp31. Butters gp31, RexB, and the membrane components  
334 of CarolAnn and Sbash Abi systems are all 4-pass transmembrane proteins.  
335 Additionally, the established stoichiometry between the two components of the Abi  
336 systems described includes two molecules of the RexA-like protein binding to one  
337 molecule of the RexB-like protein. Although not detected in a reciprocal co-IP  
338 experiment (FLAG co-IP, data not shown), the ~100kDa product for the proposed  
339 Butters gp30/gp31 complex observed in our His-co-IP is consistent with stoichiometry  
340 for RexA/B.

341 Shared features between Butters gp30/gp31 and the Abi systems described suggest  
342 that Butters gp30/gp31 may act similarly. Yet substantial differences exist between  
343 Butters gp30/gp31 and these Abi systems. First, Butters gp30 is sufficient to abolish  
344 infection by PurpleHaze and Alma. This contrasts sharply with the previously described  
345 Abi systems where the cytoplasmic component is insufficient to inhibit infection.  
346 Second, in the previously described Abi systems, the cytoplasmic component requires  
347 activation from components of the invading phage prior to binding to the membrane  
348 bound component. However, even in the absence of a “sensing” phage component, our  
349 data suggest a potential interaction between Butters gp30 and gp31. Our immunity  
350 experiments show that the Butters lysogen defends its host against infection by the  
351 heterotypic phages PurpleHaze, Island3 and Alma (Figure 3). We note that a Rubeelu  
352 prophage, which differs from Butters by 24 single nucleotide polymorphisms, shows  
353 similar immunity dynamics with respect to PurpleHaze and Island3 (data not shown).  
354 Our strategy to construct *M. smegmatis* strains that individually express gp30 or gp31 or  
355 both allowed us to evaluate the contribution of each gene to the mechanism of antiviral  
356 defense displayed in the Butters lysogen. Our immunity data show that gp31 alone has  
357 no inhibitory effect on any phages tested but Butters gp30 strongly inhibits infection by  
358 PurpleHaze and Alma (Figure 3). This inhibition is attenuated when gp30 is expressed  
359 along with gp31. The Butters gp30/31 complex may harbor some inhibitory effect for  
360 PurpleHaze but not Alma.

361 We propose a model whereby gp30 and gp31 form a complex at the membrane in the  
362 absence of heterotypic phage infection. gp30 is released from the membrane complex  
363 when the host is challenged by phage adsorption and DNA injection (e.g., from  
364 PurpleHaze), allowing gp30 to exert its antiviral effect as a cytoplasmic component  
365 (Figure 6). Preliminary adsorption assays suggest that PurpleHaze adsorption is not  
366 blocked, since adsorption efficiencies are equivalent for wild-type *M. smegmatis* and  
367 recombinant strains expressing Butters genes (C. M. Mageeney, unpublished data).  
368 Whether or not the DUF4747 domain of gp30 binds a DNA-protein complex is unknown.

369 Interestingly, defense against Cluster I1 phage Island3 must proceed by an alternative  
370 mechanism(s) since the *M. smegmatis* strain expressing gp30 alone or gp30 and gp31

371 combined provides no protection from Island3; yet, the Butters lysogen provides  
372 antiviral protection against this phage. Defense against Island3 is not repressor-  
373 mediated, as demonstrated by the inability of the ShrimpFriedEgg repressor to block  
374 Island3 infection (Figure S4B). Moreover, the Butters $\Delta$ 30 strain marginally defends  
375 against PurpleHaze and Alma, further suggesting the presence of additional defenses  
376 independent of gp30. Our results do not clarify whether the same gp30-independent  
377 defense mechanism is responsible. Within the variable region of the Butters genome, at  
378 least five other genes (32-36, not including the repressor [gene 38]) are also expressed  
379 from the prophage genome (14). These genes may also modulate defense. Thus, the  
380 Butters prophage contributes to an array of different prophage-induced defense  
381 systems within the host. Overall, several features of the model are amenable to  
382 biochemical analyses using our *M. smegmatis* strains. Analysis of defense escape  
383 mutants will no doubt be useful in deciphering the mechanism by which heterotypic  
384 phages are excluded from infection of a Butters lysogen. Altogether our work may  
385 reveal a novel mechanism of virally-encoded defense systems that protect the bacterial  
386 host against attack by heterotypic phages. These studies open the door for  
387 understanding defense mechanisms within pathogenic bacteria that may interfere with  
388 development of biocontrol strategies against bacterial infections.

389

390

## 391 **MATERIALS AND METHODS**

### 392 **Bioinformatics Analysis**

393 Transmembrane regions were predicted for each protein coding gene by submitting  
394 protein sequences to TMHMM (19, 20). Structural predictions were made for Butters  
395 gp30 and gp31 using I-TASSER (21) and PHYRE (22). Five models were predicted for  
396 Butters gp30, with the highest C-score of -4.00. The highest score alignment with  
397 proteins structures in the PDB identify Hydroxycinnamoyl-CoA:shikimate  
398 hydroxycinnamoyl transferase from *Sorghum bicolor* (PDB: 4ke4A; TM-score:0.881).  
399 PHYRE (22) predicts a similar structure with very low homology to known PDB proteins.  
400 Five models were predicted for Butters gp31, with the highest C-score of -3.65. The  
401 highest score alignment with protein structures in the PDB identify Niemann-Pick C1  
402 protein from *Homo sapiens* (PDB: 3jd8A3; TM-score: 0.723). PHYRE predicts a similar  
403 structure with very low homology to known proteins. Amino acid sequences for gp30  
404 and gp31 were submitted to HHpred (23, 24) to search for proteins with similar amino  
405 acids and/or domains using NCBI Conserved Domains Database, version 3.18 (default  
406 settings).

407

### 408 **Phage isolation, propagation, and genomic analysis**

409 Phages (GenBank accession numbers - Butters: KC576783; PurpleHaze: KY965063;  
410 Island3: HM152765; ShrimpFriedEgg: MK524528; Alma: JN699005; Eponine:  
411 MN945904) were isolated and grown on *Mycobacterium smegmatis* mc<sup>2</sup>155 as  
412 previously described (39). PurpleHaze, Island3, and Alma lysates were obtained from  
413 the Hatfull lab (University of Pittsburgh). The genomic sequence for the Island3 strain  
414 used in this study differs from the wild-type with a 257 bp deletion (coordinates 43307-  
415 43563) and a C2656T SNP. Phage lysates (titers:  $\geq 1 \times 10^9$  pfu/mL), diluted with phage  
416 buffer (0.01M Tris, pH 7.5, 0.01M MgSO<sub>4</sub>, 0.068M NaCl, 1mM CaCl<sub>2</sub>), were used for

417 immunity testing and PCR. Phamerator Actino\_Draft (version 353) (40) was used for  
418 comparative genomic analysis and genome map representation.

419

### 420 **Construction of the Butters $\Delta$ gene 30 phage mutant**

421 The  $\Delta$ 30 phage mutant was constructed using a modification of the Bacteriophage  
422 Recombineering of Electroporated DNA (BRED) approach as described (14). Four  
423 primers, along with Butters genomic DNA (purified by phenol/chloroform extraction) and  
424 Platinum High Fidelity PCR Supermix (Invitrogen), were used in a three-step PCR  
425 strategy to generate a recombination substrate (1318bp) for gene deletion. Genomic  
426 coordinates for Butters gene 30 are 24688-25899. In PCR1, primers 1 (coordinates  
427 24200-24223) and 3 (reverse coordinates 24685-24661 fused to coordinates 25879-  
428 25870) were used to generate a ~490bp amplicon. In PCR2, primers 2 (coordinates,  
429 24684-24697 merged with coordinates 25870-25899) and primer 4 (reverse coordinates  
430 26700-26677) in PCR generated a ~840bp amplicon. Primers 1 and 4 along with equal  
431 molar amounts of PCR1 and PCR2 amplicons (to create PCR3 template with ~25  
432 nucleotides of complementarity from PCR1 and PCR2 products) were used to generate  
433 the recombination substrate (~1318bp) with gene 30 deleted. The PCR-generated  
434 substrate was used for BRED after agarose gel purification, PCR clean-up (Promega),  
435 and quantification. Purified substrate (100 ng) and 150 ng of Butters genomic DNA were  
436 co-electroporated into recombineering-efficient strain *M. smegmatis* mc<sup>2</sup>155 carrying  
437 plasmid pJV53. Cell recovery, plating, PCR screening, plaque purification and  
438 amplification was as described (14). Mutant phage genomic DNA was purified and  
439 sequenced at the Pittsburgh Bacteriophage Institute as described (41). The mutant  
440 gene 30 allele contains intact 5' flanking sequences upstream of the translation start of  
441 gene 30 fused to 30bp from the very 3' end of gene 30, removing 1182bp of gene 30  
442 (spanning coordinates 24688-25870). The remaining mutant phage genomic sequence  
443 is identical to Butters (NCBI RefSeq NC\_021061) except for a T to A SNP (at coordinate  
444 25884). Primers for BRED and mutant plaque screening are shown in Table S3.

445



446 **Construction and characterization of lysogenic and recombinant *M. smegmatis***  
447 **strains**

448 Butters and Butters $\Delta$ 30 lysogens were created as described (14) and stably maintained  
449 with no evidence of the loss of lysogeny.

450 Recombinant strains to express Butters genes 30, 31, and 30\_31 were created as  
451 follows. All primers used in this study are shown in Table S3. All genes were cloned into  
452 the XbaI site of integration-proficient, kanamycin (KAN)-resistant and ampicillin (AMP)-  
453 resistant vector pMH94 (42) using conventional restriction enzyme/ligation methods.  
454 PCR primers (Integrated DNA Technologies) were designed with a 5' end XbaI site.  
455 Phage genes were amplified from Butters genomic DNA by PCR using Q5 High-Fidelity  
456 DNA polymerase (New England Biolabs). All PCR products contained the entire 179bp  
457 between gene 29 and gene 30 (containing the endogenous promoter and ribosome  
458 binding site [RBS]) to drive expression of genes 30-31. PCR products were digested  
459 with XbaI overnight (O/N), purified by gel extraction, and ligated into XbaI-digested  
460 using T4 DNA ligase (New England Biolabs) at 16°C O/N. Chemically competent *E. coli*  
461 were transformed, plated onto Kan/Amp plates, and colonies screened by PCR with  
462 primers flanking the cloning site. Recombinant plasmids were verified by sequencing  
463 (Genscript).

464  
465 Electrocompetent *M. smegmatis* mc<sup>2</sup>155 cells were prepared and transformed with  
466 recombinant pMH94 plasmids as described (43). After recovery, cells were plated on  
467 selective media containing Luria Broth agar with 50  $\mu$ g/mL kanamycin. Strains were  
468 grown in 7H9 media enriched with AD supplement, 1 mM CaCl<sub>2</sub>, 50  $\mu$ g/mL kanamycin,  
469 50 $\mu$ g/mL carbenicillin (CB) and 10 $\mu$ g/mL cycloheximide (CHX) for 5 days at 37°C.

470  
471 **Construction of pMH94\_gp31**

472 A three-step PCR method generally described above was used to generate a DNA  
473 segment containing the putative endogenous phage promoter and RBS and Butters  
474 gene 31. All primers are listed in Table S3. Primers A and C were used to generate  
475 PCR\_1, consisting of an XbaI site, all 179bp of the intergenic region upstream of gene

476 30 and the first 19bp of gene 31. Primers B and D were used to produce PCR\_2  
477 consisting of the last 20bp of the intergenic region upstream of gene 30, the entirety of  
478 gene 31, 42bp downstream of gene 31, and an XbaI site. PCR\_1 and PCR\_2 share a  
479 39bp overlap. PCR products were gel purified and 20ng of each was used as template  
480 for the final PCR\_3 using primers A and D to produce the gene 31 segment with the  
481 endogenous phage promoter and RBS. After gel purification, the PCR product was  
482 cloned into the XbaI site of pMH94, as described previously.

483

#### 484 **Plating Efficiency Assays**

485 Lawns of *M. smegmatis* strains containing pMH94 recombinant plasmids or lysogens  
486 were made by plating 250 $\mu$ L of the *M. smegmatis* strains with 3.5mL of top agar on an  
487 LB agar plate (CHX/CB). Phage lysates were serially diluted to  $10^{-7}$  and spotted (3 $\mu$ L  
488 each) onto the *M. smegmatis* lawns of interest. Plates were incubated for 48 hours at  
489 37°C. Phage growth was assessed at 24 and 48 hours and efficiency of plating (EOP)  
490 was recorded after 48 hours. EOP is calculated by first calculating the phage titer on  
491 each strain, then comparing the titers. Titer (plaque forming units/mL) = (Number of  
492 plaques/ $\mu$ L of phage spotted)\*1000 $\mu$ L/mL\*inverse dilution. EOP=Titer on experimental  
493 strain/Titer on *M. smegmatis* mc<sup>2</sup>155.

494

#### 495 **Plasmids for imaging strains**

496 All plasmids express one or two proteins of interest under the control of an inducible  
497 combinatorial promoter, P<sub>lac/ara-1</sub> (44), tightly regulated by arabinose and isopropyl  $\beta$ -D-  
498 1-thiogalactopyranoside (IPTG). Dual strains co-express gp31 and gp30, each with its  
499 own RBS. Plasmids were transformed into K-12 MG1655 *E. coli* cells. All strains used  
500 for imaging have the MG1655 genetic background (Table S2), except where we  
501 assessed FIAsh dye specificity in *M. smegmatis* (Figure S5).

502 *E. coli* SIG10 electrocompetent cells (Sigma Aldrich, Saint Louis, MO) were used to  
503 clone plasmids using a combination of standard molecular cloning techniques and  
504 Gibson Assembly (master mix from New England Biolabs, Ipswich, MA). The plasmid

505 pJS167 (45) was digested with EcoRI and the desired region amplified with primers  
506 F\_pJS167EcoRI and R\_pJS167EcoRI (Table S2) to create the ColE1 plasmid  
507 backbone. Posteriorly, constructs containing the gene(s) of interest (with or without the  
508 tetracysteine tag modification) were amplified from a Butters high titer lysate using the  
509 corresponding primers detailed in Table S2, and cloned into the backbone using Gibson  
510 Assembly. All plasmids were verified by sequencing.

511

### 512 **Microscopy/live-cell imaging**

513 To avoid expression of nonfunctional transmembrane proteins or artifacts during *in vivo*  
514 imaging due to fusion of the target protein to a 'bulky' fluorescent probe (e.g., GFP; 46),  
515 we used a biarsenical dye. This is a small (6 aa, 585 Da) membrane permeable dye that  
516 binds with high specificity to a tetracysteine (TC) tag motif of six amino acids (Cys-Cys-  
517 Pro-Gly-Cys-Cys) included in the target protein sequence (47-49). We used the FIAsh  
518 green fluorophore (508/528 nm excitation/emission, Thermo Fisher Scientific).

519 To prepare the cells for microscopy, strains were grown O/N at 37°C and with shaking  
520 in Luria Broth (Miller's modification, LB) with the corresponding antibiotic (ColEI: 50  
521 µg/ml KAN) in a cell culture volume of 10ml. Overnight cultures were diluted 1:100 into 5  
522 ml of fresh A minimal medium (Supplementary Material [SM]) with inducers (ColEI:  
523 0.7% arabinose; 2mM IPTG) and cultured for 3 hours at 37°C with shaking (for a final  
524 vol. of 5 ml, 50 µl of the O/N culture was used). One ml of cell culture was centrifuged  
525 (1500 X g for 10 mins) and resuspended in 500 µl of fresh A minimal medium with  
526 inducers. FIAsh labelling was conducted as follows: 1.25µl of dye stock (2mM), for a  
527 final concentration of 5 µM, was added, followed by a gentle vortex and incubation for  
528 45 mins at RT in the dark. Excess dye was removed by centrifugation at 1500 X g for 10  
529 mins and resuspending in 1ml of washing buffer. To reach a final concentration of 100  
530 µM of buffer per sample, 8µL of BAL buffer stock (100x, 25mM) was added to 2ml of A  
531 minimal medium with inducers. Cell cultures were incubated with washing buffer 5 mins  
532 at RT and then repeated 2x to remove any unbound or weakly bound tag. Cells were  
533 pelleted by centrifugation and resuspended in 500 µL of A minimal medium with

534 inducers. Cells (2  $\mu$ l) were loaded on agarose pads (SM) and pads were dried for ~20  
535 mins before microscopy.

536 Snapshots were taken at 37°C using an inverted microscope (Leica DMi8) equipped  
537 with a 100x /1.40 NA oil objective (HC PL APO, Leica), Kohler illumination conditions, a  
538 CMOS camera (Hamamatsu ORCA-Flash4.0 V2), and a GFP filter (Ex: 470/40 nm, Em:  
539 525/50 nm). Excitation was performed using a led lamp (Lumencore SOLA SE)  
540 ensuring that light intensity remained constant during experiments. Time exposure for  
541 phase contrast acquisition was set between 5 and 10 ms, and for FIAsh excitation at  
542 80-85 ms in all cases.

543

#### 544 **Image processing and quantification**

545 Data analysis for snapshots was performed with Fiji (ImageJ). Background  
546 (fluorescence channel) was subtracted using the sliding paraboloid feature (50 px  
547 radius). The minimum level of background fluorescence was determined using strain  
548 MG1655(gp31T), and that set the cut-off signal level for characterizing the fluorescence  
549 signal in TC-tag labelled strains. Images were processed using the Oufiti toolbox  
550 (<https://oufti.org>; 33) to segment cells and perform an initial quantification of phenotypes  
551 (length/width of cells) and fluorescence levels. Manual correction of defective  
552 segmentation was implemented. We used the 'spot detection' module in Oufiti software  
553 to detect and quantify clusters (gp31T and gp31Tgp30 strains). We developed custom-  
554 made Matlab code (Data\_Processing.m; SM) to process datasets and obtain final  
555 statistics about cell length, width, mean fluorescent intensity, and spot/cluster density for  
556 gp31T and gp31Tgp30.

557

#### 558 **Co-Immunoprecipitation Assay**

559 Two plasmids were constructed: pEXP5/Buttersgp30His was constructed according to  
560 manufacturer's instructions for pEXP5-CT-TOPO cloning (Invitrogen).  
561 pEXP5/Kan/Buttersgp31FLAG was constructed by PCR amplification of Butters

562 gene 31 with a FLAG tag and RBS. A pEXP5/kanamycin plasmid was created by  
563 replacing the AMP gene (by restriction endonuclease excision) with a KAN gene from  
564 pENTR-D-TOPO (Invitrogen) generated through PCR amplification. The KAN PCR  
565 amplicon with compatible ends was ligated into the plasmid backbone using T4 DNA  
566 ligase (Promega). The resultant pEXP5/Kan vector was linearized using XbaI and  
567 Butters gp31FLAG was ligated into the plasmid for transformation into chemically  
568 competent BL21 cells. For expression, cells were grown O/N, diluted back to OD<sub>600</sub>=  
569 0.04, and induced with 1mM IPTG to grow for 5 hours. Cells were harvested by  
570 centrifugation and lysed by sonication in 1xPBS. Whole cell lysates were added to His  
571 beads (Thermo Scientific HisPur Ni-NTA Magnetic Beads; Fisher, PI88831) and  
572 incubated O/N at 4°C. Beads were washed with modified wash buffer (PBS, 50mM  
573 Imidazol pH8), resuspended in SDS-sample buffer containing β-mercaptoethanol and  
574 incubated at 95°C for 3 minutes, prior to Western analysis. Whole cell extract inputs  
575 were prepared by trichloroacetic acid (TCA) precipitation followed by either  
576 resuspension in 2x SDS-sample buffer with β-mercaptoethanol or in 30μL of 6M urea  
577 and 2x SDS-sample buffer with β-mercaptoethanol. Inputs were boiled for 10 min.

578

## 579 **Western Analysis and Antibodies**

580 Proteins were separated by SDS-PAGE and electrotransferred onto Westran-S PVDF  
581 membrane (Whatman #10413096) as described (50). Primary antibodies (Anti-FLAG:  
582 Sigma, F3165; Anti-His: Cell Signaling Technologies, Danver, MA, 2366S) were used at  
583 1:1000. Secondary HRP conjugated goat anti-mouse IgG antibodies (Promega,  
584 Madison, WI; W4021) was used at 1:50,000.

585

586 **Data availability.** Genome sequences of all phages used in this study are available at  
587 <https://phagesdb.org>. GenBank accession numbers are provided in Materials and  
588 Methods. Sequences for constructs in this study are available by request. Microscopy  
589 images and the custom-made Matlab code to process data output from oufti software  
590 (Data\_Processing.m) are available by request.

591

592 **Author Contributions.** Conceptualization, C.M.M., H.T.M., M.D., J.B., V.C.W.;  
593 Methodology, C.M.M., H.T.M., M.D., S.A., N.C., Y.C., J.B., V.C.W.; Investigation,  
594 C.M.M., H.T.M., M.D., S.A., N.C., Y.C., J.B., V.C.W.; Writing - Original Draft, C.M.M.,  
595 H.T.M., M.D., J.B., V.C.W.; Writing - Review and Editing, C.M.M., H.T.M., M.D., S.A.,  
596 N.C., Y.C., J.B., V.C.W.; Funding Acquisition, J.B., V.C.W.

597

598 **Acknowledgments.** Funding was provided in part by the Biosystems Dynamics  
599 Summer Institute at Lehigh University and by a grant from the Pennsylvania Department  
600 of Community and Economic Development (PITA C000063030 PA DCED). CMM was  
601 partially supported by a Nemes Fellowship. HTM was supported by a Lehigh University  
602 Presidential Fellowship. MD was supported by core funding by Lehigh University. We  
603 thank the Graham Hatfull laboratory for heterotypic phage lysates, Sajedehalsadat  
604 Yazdanparast Tafti for fruitful discussions about the imaging protocols, and Antonio Leal  
605 for comments on the manuscript. We thank the phage community for thoughtful  
606 feedback about this work.

607

608

609 **References**

610

- 611 1. Piuri M, Jacobs WR JR, Hatfull GF. 2009. Fluoromycobacteriophages for rapid,  
612 specific, and sensitive antibiotic susceptibility testing of *Mycobacterium*  
613 *tuberculosis*. PLOS ONE 4:e-4870.
- 614 2. Jacobs WR Jr, Tuckman M, Bloom BR. 1987. Introduction of foreign DNA into  
615 mycobacteria using a shuttle plasmid. Nature 327: 532-535.
- 616 3. Snapper SB, Lugosi L, Jekkel A, Meltion RE, Kieser T, Bloom BR, Jacobs WR Jr.  
617 1988. Lysogeny and transformation in mycobacteria: stable expression of foreign  
618 genes. Proc. Natl. Acad. Sci. (USA) 85:6987-6991.
- 619 4. Snapper SB, Melton RE, Mustafa S, Kieser T, Jacobs WR Jr. 1990. Isolation and  
620 characterization of efficient plasmid transformation mutants of *Mycobacterium*  
621 *smegmatis*. Molec. Microbiol. 4:1911-1919.
- 622 5. Bardarov S, Bardarov S Jr, Pavelk MS Jr, Sambandamurthy V, Larsen M,  
623 Tuffariello J, Chan J, Hatfull G, Jacobs WR Jr. 2002. Specialized transduction:  
624 and efficient method for generating marked and unmarked gene disruption in  
625 *Mycobacterium tuberculosis*, *M. bovis* BCG, and *M. smegmatis*. Microbiology  
626 148:3007-3017.
- 627 6. Dedrick RM, Guerrero-Bustamante CA, Garlena RA, Russell DA, Ford K, Harris  
628 K, Gilmour KC, Soothill J, Jacobs-Sera D, Schooley RT, Hatfull GF, Spencer H.  
629 2019. Engineered bacteriophages for treatment of a patient with a disseminated  
630 drug-resistant *Mycobacterium abscessus*. Nat Med 25: 730–733.
- 631 7. Russell DA and Hatfull GF. 2017. PhageDB: the actinobacteriophage database.  
632 Bioinformatics 33(5):784-786.
- 633 8. Clark K, Karsch-Mizrachi I, Lipman DJ, Ostell J, Sayers EW. 2016. GenBank.  
634 Nucleic Acids Res.44:D67-D72.
- 635 9. Pedulla ML, Ford ME, Houtz JM, Karthikeyan T, Wadsworth C, Lewis JA,  
636 Jacobs-Sera D, Falbo J, Gross J, Pannunzio NR, Brucker W, Kumar V,  
637 Kandasamy J, Keenan L, Bardarov S, Kriakov J, Lawrence JG, Jacobs WR Jr,

- 638 Hendrix RW, Hatfull GF. 2003. Origins of highly mosaic mycobacteriophage  
639 genomes. *Cell* 113(2): 171-182.
- 640 10. Pope WH, Bowman CA, Russell DA, Jacobs-Sera D, Asai DJ, Cresawn SG,  
641 Jacobs WR, Hendrix RW, Lawrence JG, Hatfull GF, Science Education Alliance  
642 Phage Hunters Advancing Genomics and Evolutionary Science, Phage Hunters  
643 Integrating Research and Education, Mycobacterial Genetics Course. 2015.  
644 Whole genome comparison of a large collection of mycobacteriophages reveals  
645 a continuum of phage genetic diversity. *eLife* 4:e06416.
- 646 11. Casjens S. 2003. Prophages and bacterial genomics: What have we learned so  
647 far? *Molec. Microbiol.* 49: 277-300.
- 648 12. Feiner R, Argov T, Rabinovich L, Sigal N, Borovok I, Herskovits AA. 2015. A new  
649 perspective on lysogeny: prophages as active regulatory switches of bacteria.  
650 *Nature reviews* 13: 641-650.
- 651 13. Bondy-Denomy J, Qian J, Westra ER, Buckling A, Guttman DS, Davidson AR,  
652 Maxwell KL. 2016. Prophages mediate defense against phage infection through  
653 diverse mechanisms. *ISME Journal* 10(12):2854-2866.
- 654 14. Dedrick RM, Jacobs-Sera D, Guerrero C, Garland R, Mavrich T, Pope WH,  
655 Cervantes Reyes J, Russell DA, Adair T, Alvey R, Bonilla JA, Bricker JS, Brown  
656 BR, Byrnes D, Cresawn SG, Davis WB, Dickson LA, Edgington NP, Findley AM,  
657 Golebiewska U, Grose JH, Hayes CF, Hughes LE, Hutchison KW, Isern S,  
658 Johnson AA, Kenna MA, Klyczek KK, Mageeney CM, Michael SF, Molloy SD,  
659 Montgomery MT, Neitzel J, Page ST, Pizzorno MC, Poxleitner MK, Rinehart CA,  
660 Robinson CJ, Rubin MR, Teyim JN, Vazquez E, Ware VC, Washington J, Hatfull  
661 GF. 2017. Prophage-mediated defense against viral attack and viral counter-  
662 defense. *Nature Microbiology* 2:16251.
- 663 15. Gentile GM, Wetzel KS, Dedrick RM, Montgomery MT, Garland RA, Jacobs-Sera  
664 D, Hatfull GF. 2019. More Evidence of Collusion: a New Prophage-Mediated  
665 Viral Defense System Encoded by Mycobacteriophage Sbash. *mBio* 10(2). pii:  
666 e00196-19.



- 667 16. Montgomery MT, Guerrero Bustamante CA, Dedrick RM, Jacobs-Sera D, Hatfull  
668 GF. 2019. Yet More Evidence of Collusion: a New Viral Defense System  
669 Encoded by *Gordonia* Phage CarolAnn. *mBio* 10(2). pii: e02417-18.
- 670 17. Broussard GW, Oldfield LM, Villanueva VM, Lunt BL, Shine EE, Hatfull GF. 2013.  
671 Integration-dependent bacteriophage immunity provides insights into the  
672 evolution of genetic switches. *Molecular Cell* 49: 237-248.
- 673 18. Hatfull GF, Science Education Alliance Phage Hunters Advancing Genomics and  
674 Evolutionary Science (SEA-PHAGES) Program, KwaZulu-Natal Research  
675 Institute for Tuberculosis and HIV (K-RITH) Mycobacterial Genetics Course,  
676 University of California—Los Angeles Research Immersion Laboratory in  
677 Virology, Phage Hunters Integrating Research and Education (PHIRE) Program.  
678 2013. Complete Genome Sequence of 63 Mycobacteriophages. *Genome*  
679 *Announcements* 1:e00847-13.
- 680 19. Krogh A, Larsson B, von Heijne G, Sonnhammer ELL. 2001. Predicting  
681 transmembrane protein topology with a hidden Markov model: Application to  
682 complete genomes. *J. Mol. Biol.* 305:567-580.
- 683 20. Sonnhammer ELL, von Heijne G, Krogh A. 1998. A hidden Markov model for  
684 predicting transmembrane helices in protein sequences. In Glasgow J, Littlejohn  
685 T, Major F, Lathrop R, Sankoff D, Sensen C, editors, *Proceedings of the Sixth*  
686 *International Conference on Intelligent Systems for Molecular Biology*, pp. 175-  
687 182, Menlo Park, CA, AAAI Press.
- 688 21. Yang J, Yan R, Roy A, Xu D, Poisson, Zhang Y. 2015. The I-TASSER Suite:  
689 Protein structure and function prediction. *Nature methods* 12: 7-8.
- 690 22. Kelley LA, Mezulis S, Yates CM, Wass MN, Sternberg MJ. 2015. The Phyre2  
691 web portal for protein modeling prediction and analysis. *Nature protocols* 10:  
692 845-858.
- 693 23. Alva V, Nam SZ, Söding J, Lupas AN. 2016. The MPI bioinformatics Toolkit as  
694 an integrative platform for advanced protein sequence and structure analysis.  
695 *Nucleic Acids Res.* 44: W410-415.
- 696 24. Söding J. 2005. Protein homology detection by HMM-HMM comparison.  
697 *Bioinformatics*: 21: 951-960.

- 698 25. Snyder L. 1995. Phage-exclusion enzymes: a bonanza of biochemical and cell  
699 biology reagents? *Mol. Microbiol.* 15:415– 420.
- 700 26. Parma DH, Snyder M, Sobolevski S, Nawroz M, Brody E, Gold L. 1992. The Rex  
701 system of bacteriophage lambda: tolerance and altruistic cell death. *Genes Dev*  
702 6:497–510.
- 703 27. Labrie SJ, Samson JE, Moineau S. 2010. Bacteriophage resistance  
704 mechanisms. *Nature Reviews Microbiol.* 8: 317-327.
- 705 28. Zimmermann L, Stephens A, Nam SZ, Rau D, Kübler J, Lozajic M, Gabler F,  
706 Söding J, Lupas AN, Alva V. 2018. A Completely Reimplemented MPI  
707 Bioinformatics Toolkit with a New HHpred Server at its Core. *J Mol. Biol.* S0022-  
708 2836:30587-30589.
- 709 29. Young R. 2002. Bacteriophage holins: deadly diversity. *J.Molec. Microbiol.*  
710 *Biotech.* 4: 21-36.
- 711 30. Kamilla D, Jain V. 2016. Mycobacteriophage D29 holin C-terminal region  
712 functionally assists in holin aggregation and bacterial cell death. *FEBS J.* 283:  
713 173-190.
- 714 31. Kongari R, Snowden J, Berry JD, Young R. 2018. Localization and regulation of  
715 the T1 unimolecular spanin. *J. Virol.* 92:e00380-18.
- 716 32. White R, Chiba S, Pang T, Dewey JS, Savva CG, Holzenburg A, Pogliano K,  
717 Young R. 2011. Holin triggering in real time. *Proc. Natl. Acad. Sci. (USA)* 108:  
718 798-803.
- 719 33. Paintdakhi A, Parry B, Campos M, Irnov I, Elf J, Surovtsev I, Jacobs-Wagner, C.  
720 2016. Oufiti: an integrated software package for high-accuracy, high-throughput  
721 quantitative microscopy analysis. *Mol. Microbiol.* 99:767-777.
- 722 34. Makarova KS, Wolf YI, Koonin EV. 2013. Comparative genomics of defense  
723 systems in archaea and bacteria. *Nucl. Acids Res.* 41: 4360-4377.
- 724 35. Hampton, H.G., Watson, B.N.J. & Fineran, P.C. The arms race between bacteria  
725 and their phage foes. *Nature* **577**, 327–336 (2020).
- 726 36. Landsmann J, Kroger M, Hobom G. 1982. The rex region of bacteriophage  
727 Lambda: Two genes under three-way control. *Gene* 20: 11-24.

- 728 37. Toothman P, Herskowitz I. 1980. Rex-dependent exclusion of lambdoid phages I.  
729 Prophage requirements for exclusion. *Virology* 102: 133-146.
- 730 38. Synder L, McWilliams K. 1989. The rex genes of bacteriophage lambda can  
731 inhibit cell function without phage superinfection. *Gene* 81: 17-24.
- 732 39. Jacobs-Sera D, Marinelli LJ, Bowman C, Broussard GW, Guerrero Bustamante  
733 C, Boyle MM, Petrova ZO, Dedrick RM, Pope WH, Science Education Alliance  
734 Phage Hunters Advancing Genomics and Evolutionary Sciences SEA-PHAGES  
735 Program, Modlin RL, Hendrix RW, Hatfull GF. 2012. On the nature of  
736 mycobacteriophage diversity and host preference. *Virology* 434: 187-201.
- 737 40. Cresawn SG, Bogel M, Day N, Jacobs-Sera D, Hendrix RW, Hatfull GF. 2011.  
738 Phamerator: a bioinformatic tool for comparative bacteriophage genomics. *BMC*  
739 *Bioinformatics* 12: 395.
- 740 41. Russell DA. 2018. Sequencing, assembling, and finishing complete  
741 bacteriophage genomes. *Methods Mol. Biol.* 1681:109 –125.
- 742 42. Lee MH, Pascopella L, Jacobs WR, Hatfull GF. 1991. Site-specific integration of  
743 mycobacteriophage L5: integration-proficient vectors for *Mycobacterium*  
744 *smegmatis*, *Mycobacterium tuberculosis*, and *bacille Calmette-Guerin*. *Proc. Natl.*  
745 *Acad. Sci. USA* 88: 3111-3115.
- 746 43. Cirillo JD, Weisbrod TR, Jacobs Jr WR. 1993. Efficient electrotransformation of  
747 *Mycobacterium smegmatis*. *Bio-Rad US/EG Bull.* 1360:1-4.
- 748 44. Lutz R, Bujard H. 1997. Independent and tight regulation of transcriptional units  
749 in *Escherichia coli* via the LacR/O, the TetR/O and AraC/I1-I2 regulatory  
750 elements. *Nucleic Acids Res.* 25:1203-1210.
- 751 45. Stricker J, Cookson S, Bennett MR, Mather WH, Tsimring LS, Hasty J. 2008. A  
752 fast, robust and tunable synthetic gene oscillator. *Nature* 456: 516-519.
- 753 46. Margolin W. 2012. The price of tags in protein localization studies. *J.*  
754 *Bacteriology* 194: 6369-6371.
- 755 47. Griffin BA, Adams SR, Tsien RY. 1998. Specific covalent labeling of recombinant  
756 protein molecules inside live cells. *Science* 281: 269-272.
- 757 48. Adams SR, Campbell RE, Gross LA, Martin BR, Walkup GK, Yao Y, Llopis J,  
758 Tsien RY. 2002. New biarsenical ligands and tetracysteine motifs for protein

759 labeling *in vitro* and *in vivo*: synthesis and biological applications. J. American  
760 Chemical Society 124: 6063-6076.

761 49. Giepmans BN, Adams SR, Ellisman MH, Tsien RY. 2006. The fluorescent  
762 toolbox for assessing protein location and function. Science 312: 217-224.

763 50. Kearse MG, Chen AS, Ware VC. 2011. Expression of ribosomal protein L22e  
764 family members in *Drosophila melanogaster*: rpL22-like is differentially expressed  
765 and alternatively spliced. Nucleic Acids Res. 39: 2701–2716.

766

767 **Figure Legends**

768

769 **Figure 1.** Posterior probabilities for protein gp30 (**A**) and gp31 (**B**) as predicted by  
770 TMHMM (19, 20). The amino acids index is shown on the horizontal axis. The blue,  
771 purple, and red lines indicate the probability of an aa being located inside, outside, or  
772 within the cell membrane, respectively. Butters gp30 is predicted as a protein with  
773 domains outside the membrane (cytoplasmic). Butters gp31 is predicted to have 4-pass  
774 transmembrane domains (membrane protein). **C, D.** Predicted secondary structures of  
775 proteins gp30 (**C**) and gp31 (**D**) using I-TASSER (21) and PHYRE (22). The long,  
776 parallel, alpha helices of gp31 are characteristic of membrane proteins as predicted by  
777 TMHMM.

778

779 **Figure 2.** Genomic synteny of selected phage-encoded exclusive systems **A.** Central  
780 “variable region” of Butters genome. The gene colors and numbers represent gene  
781 families designated by Phamerator database Actino\_Draft (version 353) (40); the  
782 number of family members is shown in parentheses. Rightward and leftward  
783 transcribed genes are shown above and below, respectively. The blue bar on top of  
784 gene 30 indicates the DUF4747 domain. **B.** Syntenic representation of two-component  
785 exclusion systems found in bacteriophages Sbash, CarolAnn, and Lambda. Butters  
786 genes 30 and 31 are compared to the Abi systems of Sbash, CarolAnn, and Lambda.  
787 Genes (represented as boxes) are aligned to their genome (ruler) labeled with  
788 coordinates. The conserved DUF4747 domain is aligned on the putative cytoplasmic  
789 component of the exclusion system (blue bar). Transcription is from left to right in all  
790 cases. Genomes of CarolAnn and Lambda have been reversed to aid comparison.

791

792 **Figure 3.** Plating efficiencies of heterotypic phages on *M. smegmatis* mc<sup>2</sup>155 strains  
793 expressing gp30, gp31, or gp30-31 (designated as mc<sup>2</sup>155(gp30), mc<sup>2</sup>155(gp31), and  
794 mc<sup>2</sup>155(gp30-31), respectively). Phages spotted are listed on the left: PH (PurpleHaze);  
795 Is3 (Island3); SFE (ShrimpFriedEgg); Alma; Epn (Eponine). Phage lysates were serially  
796 diluted to 10<sup>-7</sup> and spotted (3μL each) onto a lawn of each bacterium plated with 1xTA.

797 ShrimpFriedEgg (Cluster N) inhibition on mc<sup>2</sup>155(Butters), and mc<sup>2</sup>155(ButtersΔ30) is  
798 repressor-mediated (14). mc<sup>2</sup>155(gp30) defends against PurpleHaze(A3) and Alma(A9)  
799 but not Island3(I1). gp30-mediated defense is attenuated in the presence of gp31. In  
800 agreement with previous results (14), Island3 and Alma show reduced plating  
801 efficiencies on mc<sup>2</sup>155(Butters). On both lysogen lawns, the absence of individual  
802 plaques in the dilution series for Island3 and ShrimpFriedEgg suggest that observed  
803 clearings are due to “killing from without” and not infection.

804

805 **Figure 4.** Snapshots of representative microscopy images of *E. coli* cells expressing  
806 gp31, gp30, and co-expressing gp30 and gp31 using the tetracysteine (FIAsH) tag  
807 detection system. Wild-type *E. coli* cells (MG1655) were used as a control. Proteins  
808 modified to include the FIAsH tag are indicated by a final “T” letter. All images have  
809 been normalized to the same fluorescence intensity scale. The white bar scale stands  
810 for 5µm in all cases. The zoomed images (right) highlight representative patterns of  
811 expression. Quantification of phenotypes and fluorescence average intensities is shown  
812 in Fig. S7.

813

814 **Figure 5.** Butters gp30-His Immunoprecipitation. Western analysis of BL21 *E. coli* cells  
815 expressing Butters gp30-His and Butters gp31FLAG alone or together. The input  
816 resuspended in 6M urea shows the expected 40kDa gp30-His protein in strains  
817 expressing gp30-His when probed with anti-His. The input resuspended in SDS lacks a  
818 40kDa moiety when probed with a His antibody, which may suggest the tag is masked  
819 and cannot be accessed by the antibody. Similarly, the input probed with a FLAG  
820 antibody shows gp31FLAG at 25kDa in the gp31FLAG and dual strains. Following the  
821 His-IP, a ~100kD band is visible when probed for FLAG, suggesting a stoichiometric  
822 relationship between gp30-His and gp31FLAG that is not 1:1.

823

824 **Figure 6.** Model for Butters defense against viral attack. *Mycobacterium* phage Butters  
825 gp30 and gp31 are proposed to interact at the membrane. Numbers in cartoon arrows

826 indicate sequence of events. (1) gp30 release from gp31 is mediated by an unknown  
827 mechanism and may be triggered by phage interaction or gp31 interactions with other  
828 phage or host proteins. (2) When gp30 is released from interacting with gp31 at the  
829 membrane, it is liberated into the cytosol. (3) The cytoplasmic form of gp30 may  
830 facilitate host defense against select viral infections. Host defense may proceed  
831 following phage adsorption and subsequent DNA injection. Dashed arrows correspond  
832 to unconfirmed hypotheses. Butters proteins shown are expressed from the variable  
833 region (between the lysis and immunity cassettes). The complete prophage expression  
834 profile is described (14). Three additional membrane proteins (gp33, gp35, gp36) and  
835 two additional cytoplasmic proteins (gp32, gp34) are expressed from the “variable  
836 region” of Butters (right panel). The roles of these additional five proteins in prophage-  
837 mediated defense is unknown but may include additional defense mechanisms against  
838 other heterotypic phages. Some phages escape all mechanisms of defense mounted  
839 within a Butters lysogen.

840

841 **Figures**

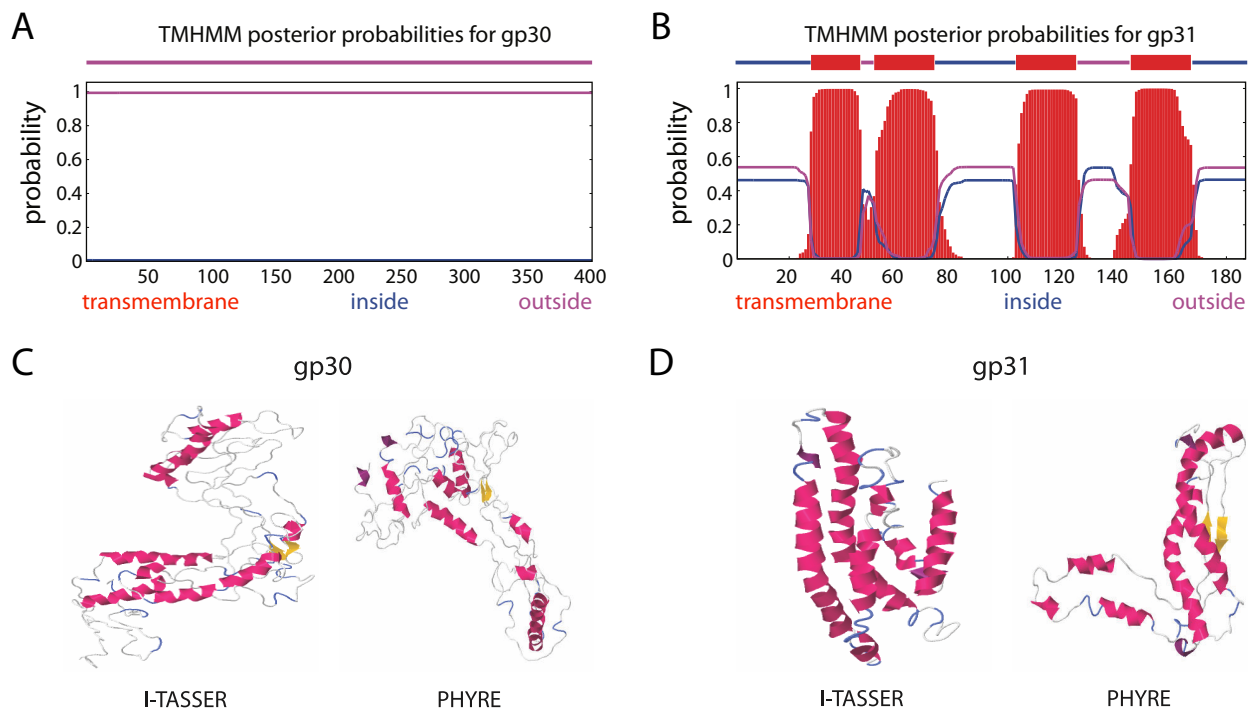

842

843 **Figure 1.** Posterior probabilities for protein gp30 (A) and gp31 (B) as predicted by  
844 TMHMM (19, 20). The amino acids index is shown on the horizontal axis. The blue,  
845 purple, and red lines indicate the probability of an aa being located inside, outside, or  
846 within the cell membrane, respectively. Butters gp30 is predicted as a protein with  
847 domains outside the membrane (cytoplasmic). Butters gp31 is predicted to have 4-pass  
848 transmembrane domains (membrane protein). C, D. Predicted secondary structures of  
849 proteins gp30 (C) and gp31 (D) using I-TASSER (21) and PHYRE (22). The long,  
850 parallel, alpha helices of gp31 are characteristic of membrane proteins as predicted by  
851 TMHMM.



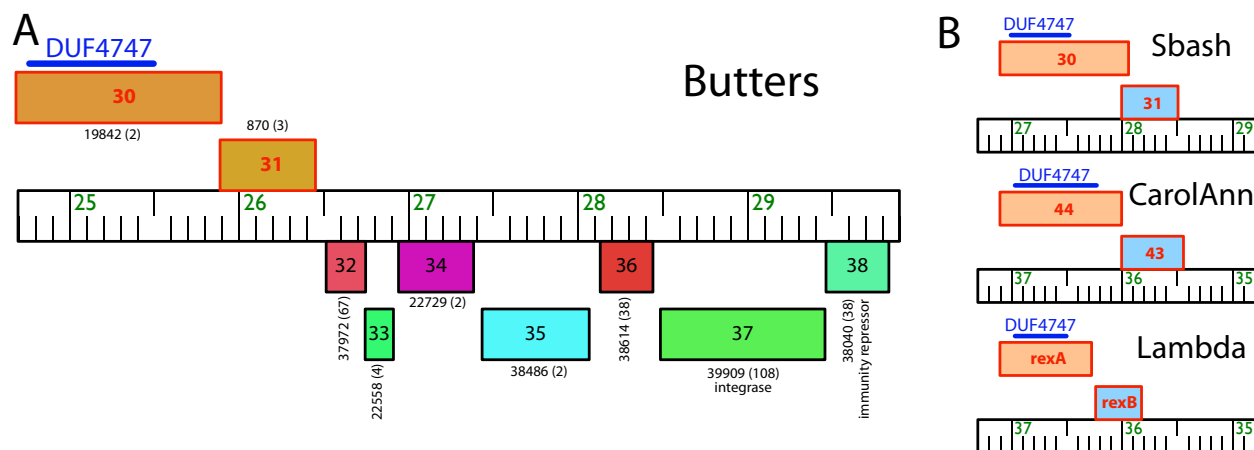

852

853 **Figure 2.** Genomic synteny of selected phage-encoded exclusive systems **A.** Central  
854 “variable region” of Butters genome. The gene colors and numbers represent gene  
855 families designated by Phamerator database Actino\_Draft (version 353) (40); the  
856 number of family members is shown in parentheses. Rightward and leftward  
857 transcribed genes are shown above and below, respectively. The blue bar on top of  
858 gene 30 indicates the DUF4747 domain. **B.** Syntenic representation of two-component  
859 exclusion systems found in bacteriophages Sbash, CarolAnn, and Lambda. Butters  
860 genes 30 and 31 are compared to the Abi systems of Sbash, CarolAnn, and Lambda.  
861 Genes (represented as boxes) are aligned to their genome (ruler) labeled with  
862 coordinates. The conserved DUF4747 domain is aligned on the putative cytoplasmic  
863 component of the exclusion system (blue bar). Transcription is from left to right in all  
864 cases. Genomes of CarolAnn and Lambda have been reversed to aid comparison.

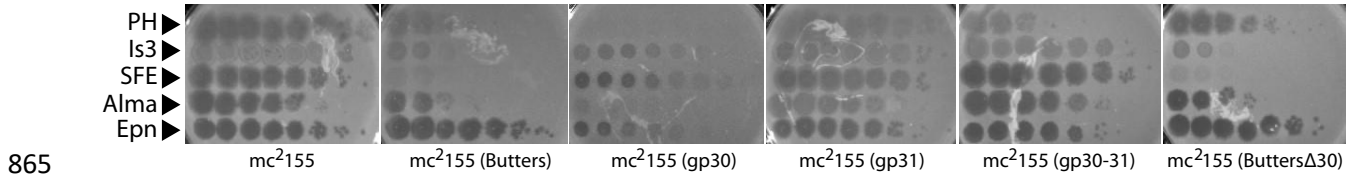

866 **Figure 3.** Plating efficiencies of heterotypic phages on *M. smegmatis* mc<sup>2</sup>155 strains  
867 expressing gp30, gp31, or gp30-31 (designated as mc<sup>2</sup>155(gp30), mc<sup>2</sup>155(gp31), and  
868 mc<sup>2</sup>155(gp30-31), respectively). Phages spotted are listed on the left: PH (PurpleHaze);  
869 Is3 (Island3); SFE (ShrimpFriedEgg); Alma; Epn (Eponine). Phage lysates were serially  
870 diluted to 10<sup>-7</sup> and spotted (3μL each) onto a lawn of each bacterium plated with 1xTA.  
871 ShrimpFriedEgg (Cluster N) inhibition on mc<sup>2</sup>155(Butters), and mc<sup>2</sup>155(ButtersΔ30) is  
872 repressor-mediated (14). mc<sup>2</sup>155(gp30) defends against PurpleHaze(A3) and Alma(A9)  
873 but not Island3(I1). gp30-mediated defense is attenuated in the presence of gp31. In  
874 agreement with previous results (14), Island3 and Alma show reduced plating  
875 efficiencies on mc<sup>2</sup>155(Butters). On both lysogen lawns, the absence of individual  
876 plaques in the dilution series for Island3 and ShrimpFriedEgg suggest that observed  
877 clearings are due to “killing from without” and not infection.

878

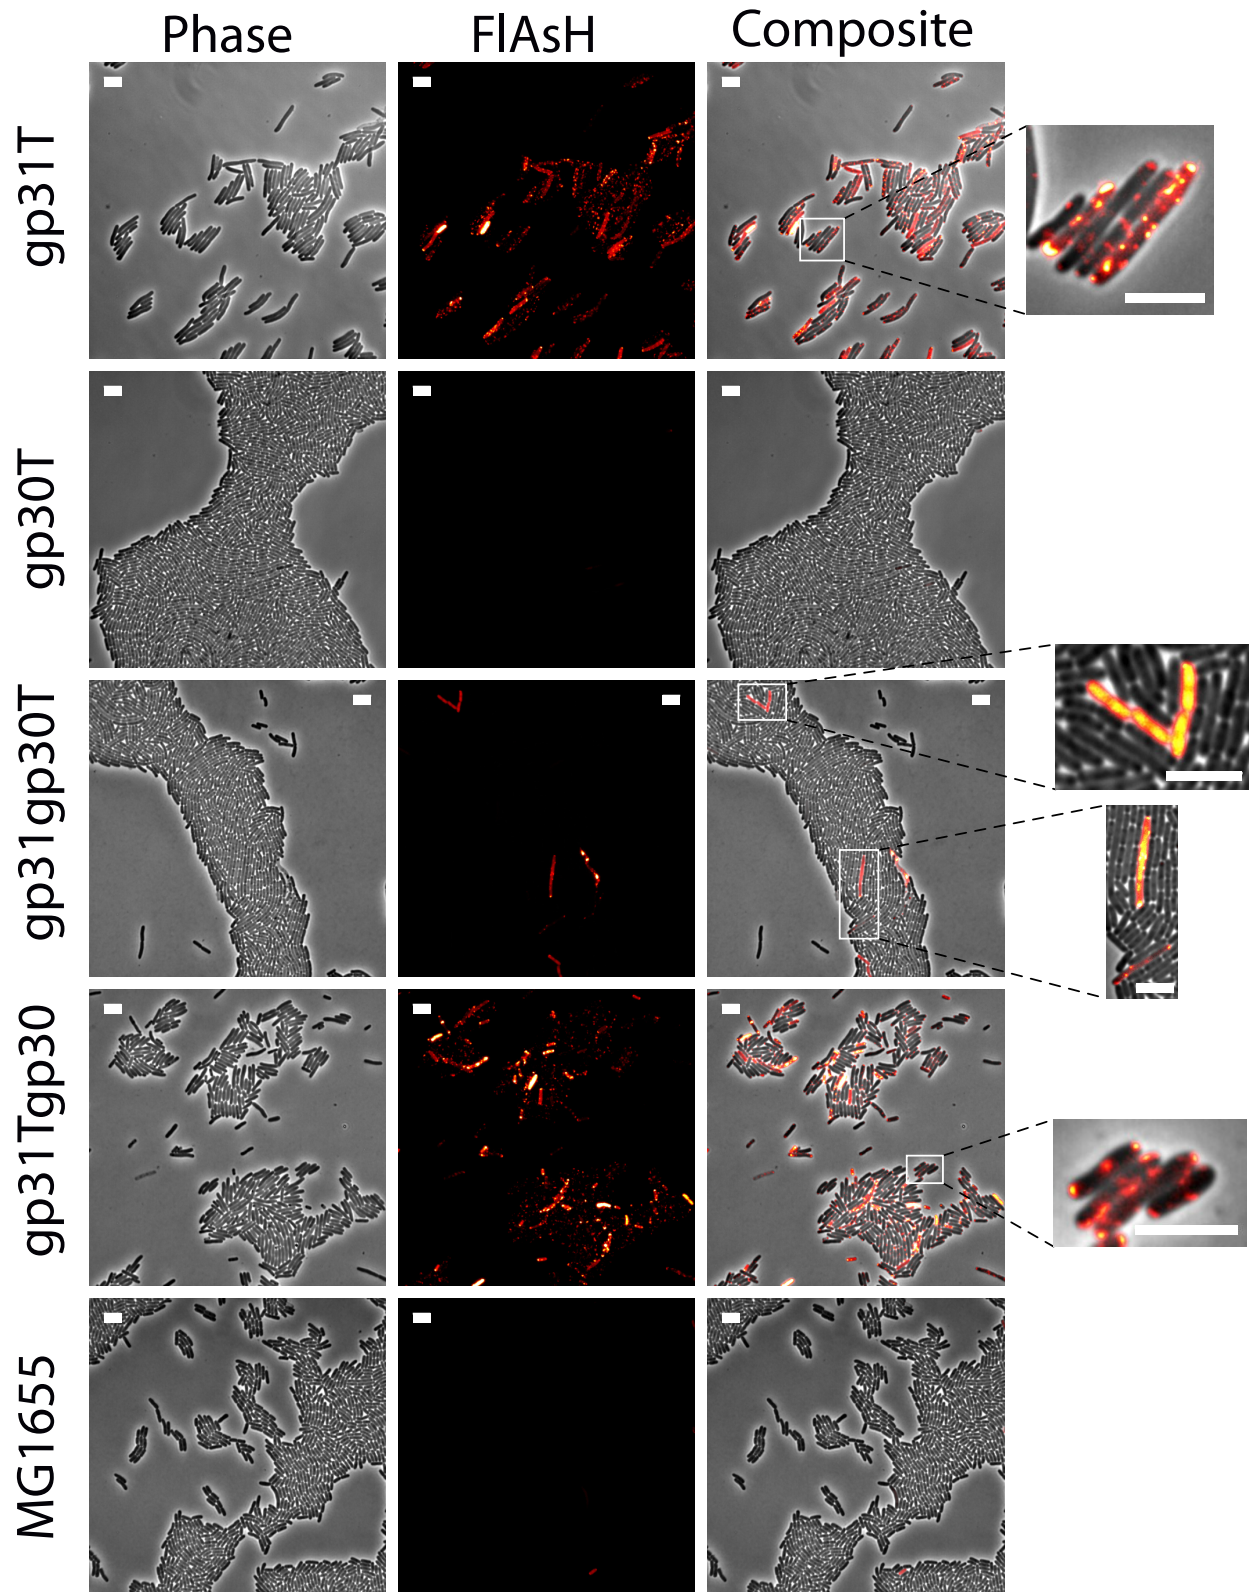

879

880 **Figure 4.** Snapshots of representative microscopy images of *E. coli* cells expressing  
881 gp31, gp30, and co-expressing gp30 and gp31 using the tetracysteine (FIAsH) tag

882 detection system. Wild-type *E. coli* cells (MG1655) were used as a control. Proteins  
883 modified to include the FIAsh tag are indicated by a final “T” letter. All images have  
884 been normalized to the same fluorescence intensity scale. The white bar scale stands  
885 for 5µm in all cases. The zoomed images (right) highlight representative patterns of  
886 expression. Quantification of phenotypes and fluorescence average intensities is shown  
887 in Fig. S7.

888

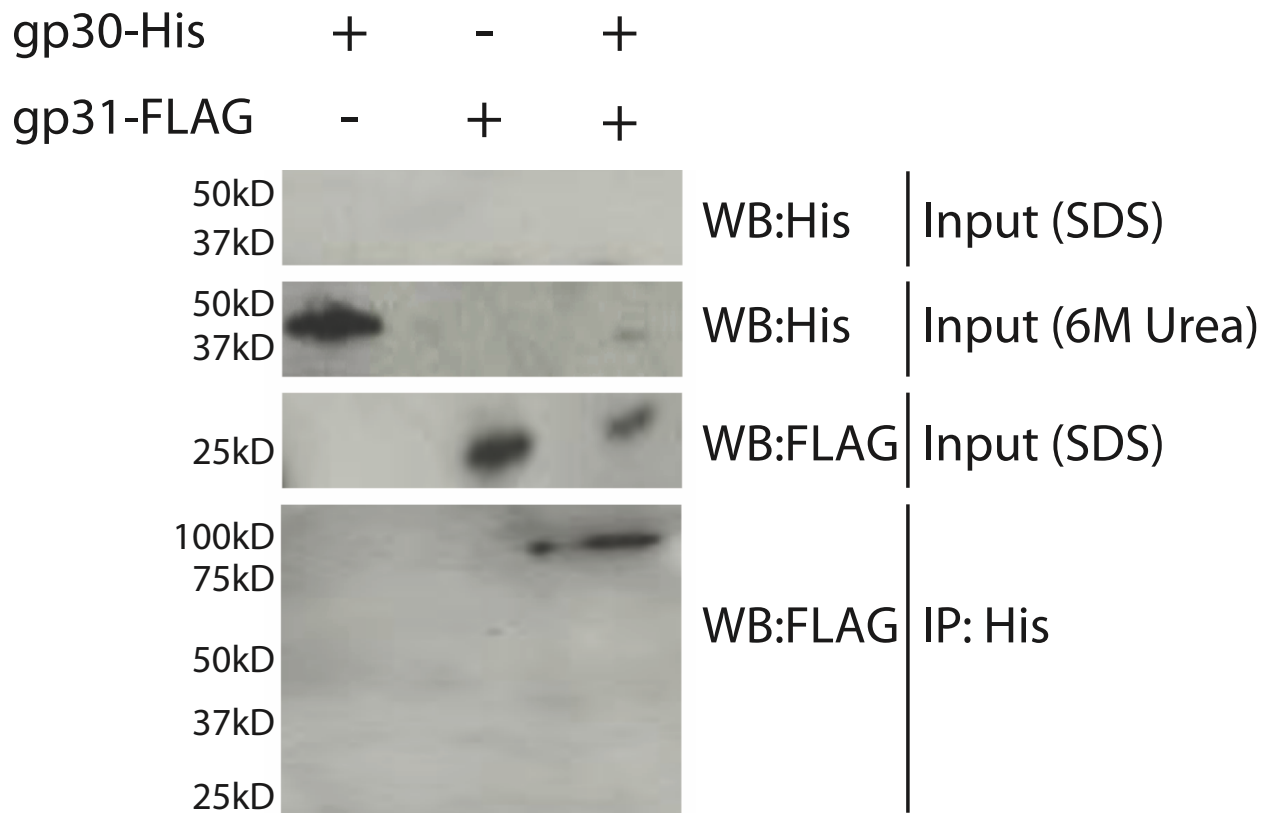

889

890 **Figure 5.** Butters gp30-His Immunoprecipitation. Western analysis of BL21 *E. coli* cells  
891 expressing Butters gp30-His and Butters gp31FLAG alone or together. The input  
892 resuspended in 6M urea shows the expected 40kDa gp30-His protein in strains  
893 expressing gp30-His when probed with anti-His. The input resuspended in SDS lacks a  
894 40kDa moiety when probed with a His antibody, which may suggest the tag is masked  
895 and cannot be accessed by the antibody. Similarly, the input probed with a FLAG  
896 antibody shows gp31FLAG at 25kDa in the gp31FLAG and dual strains. Following the  
897 His-IP, a ~100kD band is visible when probed for FLAG, suggesting a stoichiometric  
898 relationship between gp30-His and gp31FLAG that is not 1:1.

899

## Model for Butters defense against viral attack

## Other Butters proteins

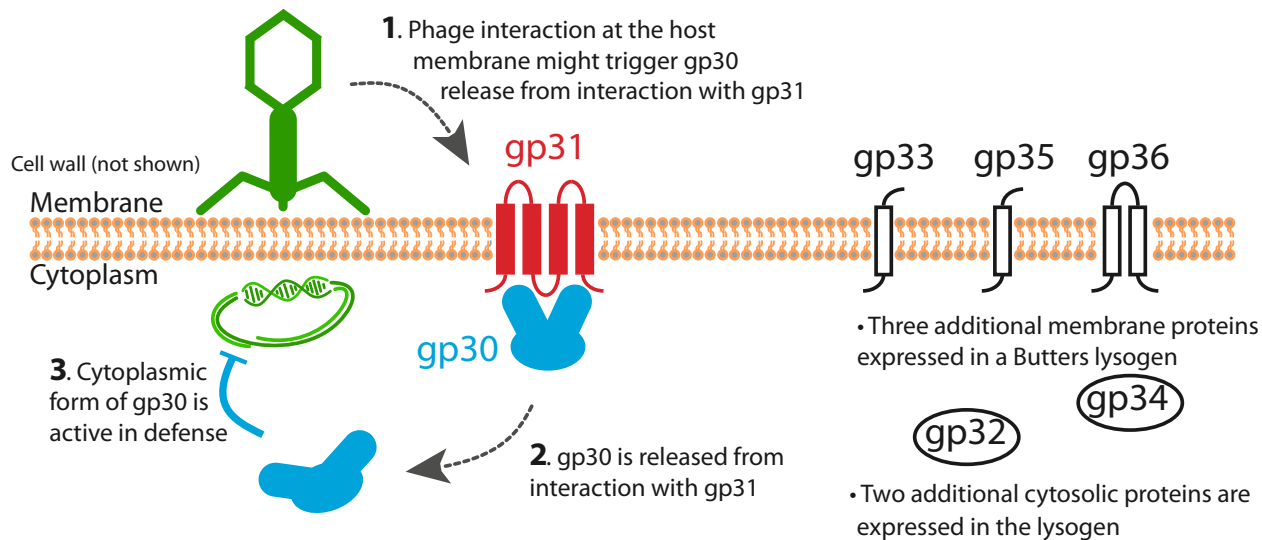

900

901 **Figure 6.** Model for Butters defense against viral attack. *Mycobacterium* phage Butters  
902 gp30 and gp31 are proposed to interact at the membrane. Numbers in cartoon arrows  
903 indicate sequence of events. (1) gp30 release from gp31 is mediated by an unknown  
904 mechanism and may be triggered by phage interaction or gp31 interactions with other  
905 phage or host proteins. (2) When gp30 is released from interacting with gp31 at the  
906 membrane, it is liberated into the cytosol. (3) The cytoplasmic form of gp30 may  
907 facilitate host defense against select viral infections. Host defense may proceed  
908 following phage adsorption and subsequent DNA injection. Dashed arrows correspond  
909 to unconfirmed hypotheses. Butters proteins shown are expressed from the variable  
910 region (between the lysis and immunity cassettes). The complete prophage expression  
911 profile is described (14). Three additional membrane proteins (gp33, gp35, gp36) and  
912 two additional cytoplasmic proteins (gp32, gp34) are expressed from the “variable  
913 region” of Butters (right panel). The roles of these additional five proteins in prophage-  
914 mediated defense is unknown but may include additional defense mechanisms against  
915 other heterotypic phages. Some phages escape all mechanisms of defense mounted  
916 within a Butters lysogen.
